# Supplementary material for: EVB and polarizable MM study of energy relaxation in fluorine–acetonitrile reactions
Source: Royal Society of Chemistry journal article supplement (doi:10.1039/c8cp06686h), 2019-01-01
Supplement: c8cp06686h1.pdf [file c8cp06686h1.pdf]

# ***Supporting Information for*** **EVB and polarizable MM study of energy relaxation in fluorine- acetonitrile reactions**

Xiaoyong Zhang and Jeremy N Harvey\*

Department of Chemistry, KU Leuven, Celestijnenlaan 200F, B-3001 Leuven,  
Belgium

## **Contents**

|                                              |    |
|----------------------------------------------|----|
| 1. Covalent-Ionic Model of DF molecule ..... | 1  |
| 2. Proton-Transfer EVB Model.....            | 6  |
| 3. AMOEBA Force Field .....                  | 7  |
| 4. Radial Distribution Function.....         | 11 |

## **1. Covalent-Ionic Model of DF molecule**

### **1.1. MRCI Calculation**

CASSCF/MRCI-F12<sup>1</sup> calculations were performed for isolated HF molecule with all the valence orbitals ( H 1s orbital, F 2s and 2p orbitals) in the active space and the F 1s orbital in the inactive space. The CI energies were further corrected by the Davidson correction method. The dipole moment at a given geometry was calculated by the finite difference approximation method as the energy derivative,

$$\mu \cong \frac{E(d) - E(-d)}{2d}$$

in which,  $d$  is the strength of the external dipole field added to the one-electron Hamiltonian. The direction of the field is oriented along the D-F bond axis. The

calculated energy and dipole moment as a function of HF interatomic distance is presented in Figure S1.

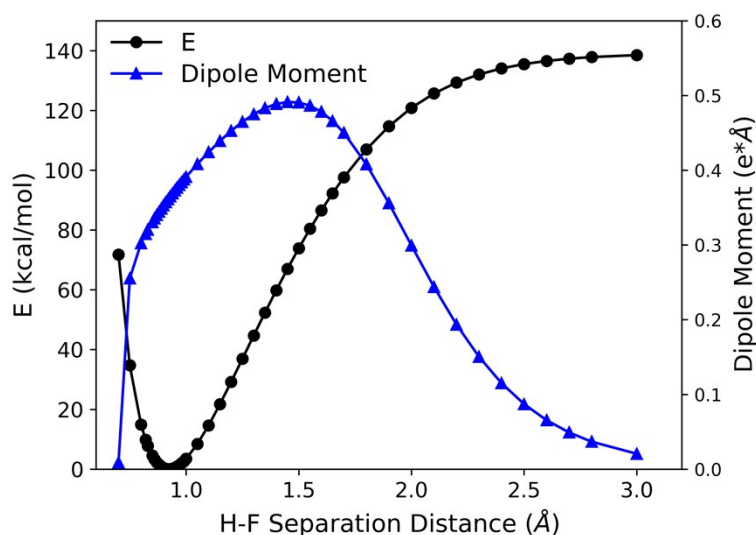

**Figure S1.** Energy (kcal/mol) and dipole moments ( $e\cdot\text{\AA}$ ) along the H-F stretch coordinate at the MRCI-F12/aug-cc-pVTZ level.

## 1.2. Ab initio Valence Bond Calculations

The ab initio valence bond (VB) calculations, mainly localized VBSCF and VBCISD with strictly localized VB occupied and virtual orbitals for the covalent D-F and ionic  $D^+ F^-$  states, were performed using the XMVB software package.<sup>2</sup> The basis set used is 6-311+G\*\*. Conceptually, the basis functions are divided into four blocks, including  $\sigma$ -type (s, pz, dxx, dyy and dzz) basis functions centered on F, px and dxz type basis functions centered on F, py and dyz type basis functions centered on F, and  $\sigma$ -type (s and pz) basis functions centered on D. The occupied VB orbitals within a specific block are constructed using only the basis functions belonging to that block. In the CI-calculation, excited VB structures are constructed by replacing occupied orbitals with virtual orbitals within the same block. The F 1s orbital was chosen to be frozen in the CI-type VB calculation.

**Table S1.** Comparison of the  $IP(H) + EA(F)$  value (kcal/mol) predicted by different *ab initio* VB methods and experiment.

| $IP(H) + EA(F)$ | 6-31+G* | 6-31+G** | 6-31++G** | 6-311+G** |
|-----------------|---------|----------|-----------|-----------|
| VBSCF           | 281.13  | 281.13   | 281.48    | 282.65    |
| VBCISD          | 232.60  | 232.60   | 232.96    | 238.90    |
| Exp.            | 235.32  |          |           |           |

### 1.3. Covalent-Ionic DF EVB Model Fitting

The procedure shown in Figure S2 was followed to fit the covalent-ionic EVB model of the DF molecule. As described in the main context, the covalent state is fitted by a generalized Morse function, while the ionic state is described by a modified electrostatic potential. The general expression used for  $H_{12}$  is shown as follows:

$$H_{12} = \sum_{i=1}^3 A_i * \exp\left\{-\frac{1}{2}\left(\frac{(r - C_i)}{\sigma_i}\right)^2\right\}$$

in which,  $A_i$ ,  $C_i$  and  $\sigma_i$  correspond to the amplitude, center and width of the  $i$  th Gaussian function. In the fitting, several parameters in the diagonal and off-diagonal matrix element expressions are varied in order to reproduce as accurately as possible both the MRCI-F12 energies and dipole moments. The final parameters are listed in Table S2.

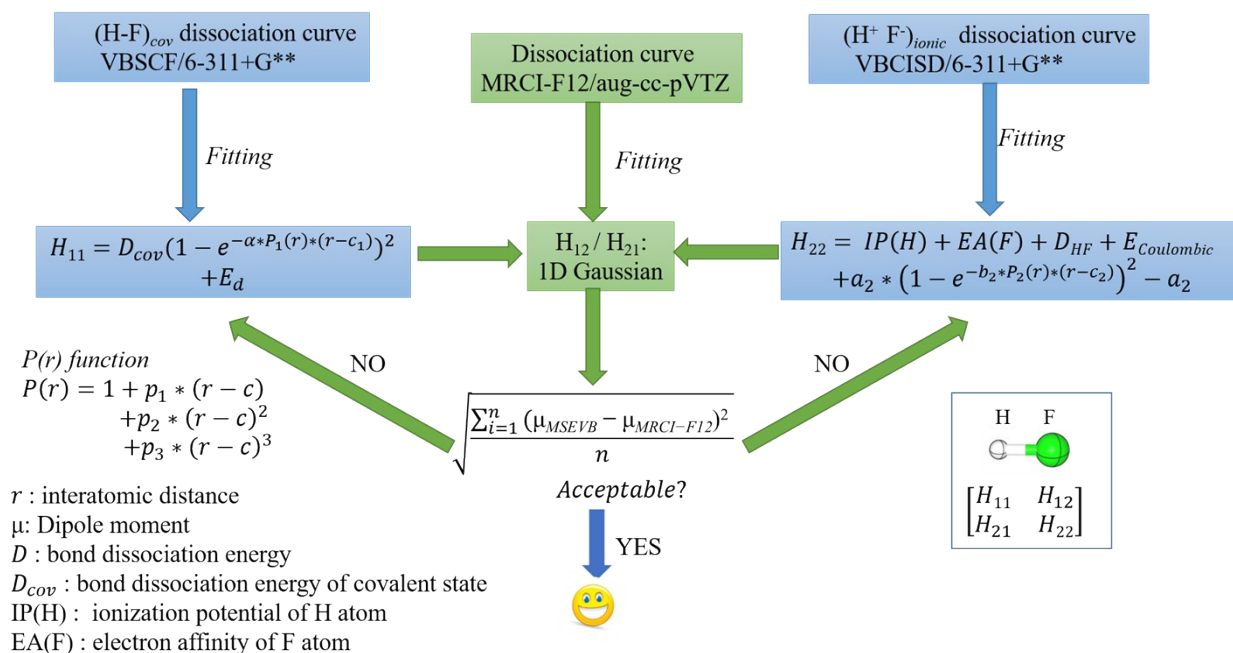

**Figure S2.** The work flow to fit the covalent-ionic EVB model of HF molecule.

**Table S2.** Determined parameters in the covalent-ionic EVB model.

| $H_{11}$ elements |         | $H_{22}$ elements |        | $H_{12}$ elements |        |
|-------------------|---------|-------------------|--------|-------------------|--------|
| $D_{cov}$         | 56.26   | $D_e$             | 139.76 | $A_1$             | 109.77 |
| $c_1$             | 0.8663  | $a_2$             | 3.4908 | $C_1$             | 0.95   |
| $\alpha_1$        | 3.9771  | $b_2$             | 4.6493 | $\sigma_1$        | 0.47   |
| $p_1$             | 0.1394  | $c_2$             | 2.7335 | $A_2$             | -27.04 |
| $p_2$             | -0.7260 | $p_4$             | 1.1947 | $C_2$             | 0.61   |
| $p_3$             | 0.3780  | $p_5$             | 0.5800 | $\sigma_2$        | 0.05   |
| $E_d$             | 83.50   | $p_6$             | 0.0863 | $A_3$             | 33.58  |
|                   |         |                   |        | $C_3$             | 1.77   |
|                   |         |                   |        | $\sigma_3$        | 0.34   |

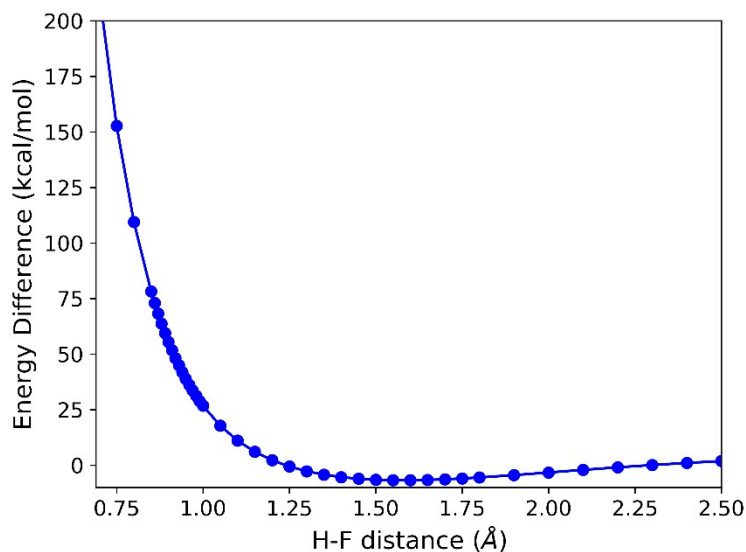

**Figure S3.** Difference in energy (kcal/mol) between the potential energy curve for the ionic state as obtained from VBCISD calculations, and from the buffered coulombic expression in MMFF. For all distances above 1.25 Å, the two expressions agree well.

The non-bonded parameters for the atoms in the covalent DF state can be found below in Tinker MMFF format. Including a positive charge on the  $D^+$  centre in the ionic state was accomplished in Tinker through by some coding work (kcharge.f), while the non-bond parameter of  $F^-$  used the original value.

```

atom      56  11  F  "FLUORINE"                9  18.998  1
atom     217 102  D  "D in covalent DF state"    1   2.016  1
mmffvdw   11  1.07111      1.28124  8.71732  3.83487  A
mmffvdw  102  0.00003      0.49438  0.02068  1.91530  D
mmffbci   11  102  0.0000  0

```

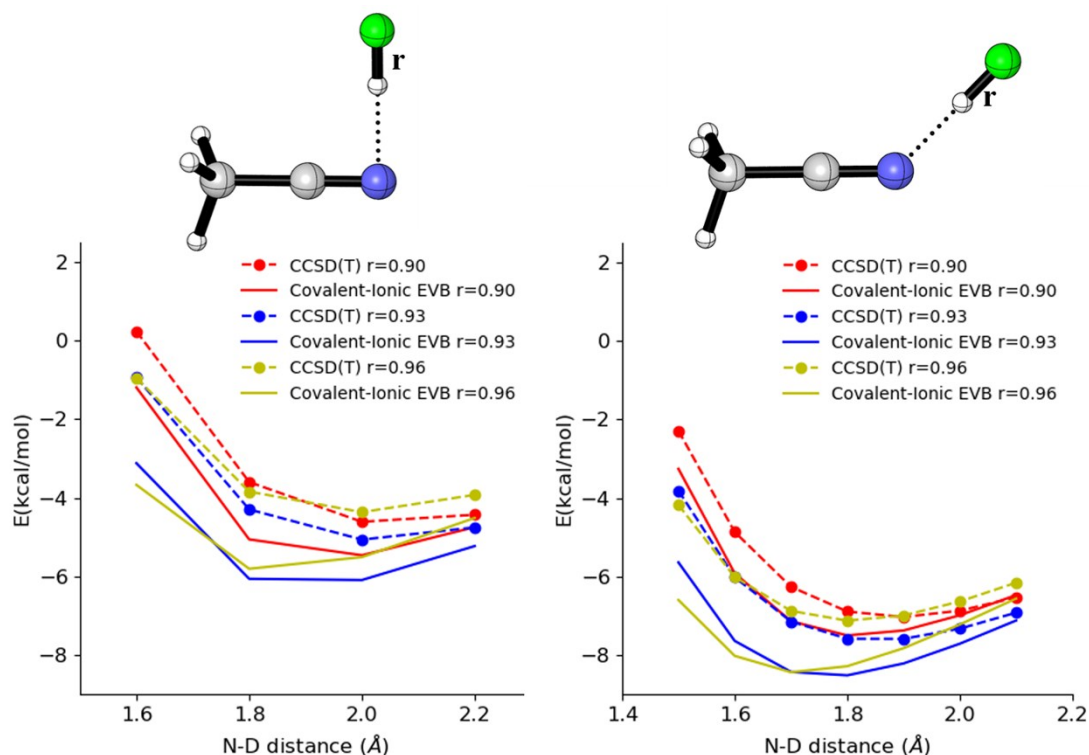

**Figure S4.** Energies (kcal/mol) of the CD<sub>3</sub>CN---DF complex for bent structures (angle C-N-D of respectively 90 and 135 degrees) around the potential energy surface minimum, as obtained by CCSD(T)-F12 and covalent-ionic EVB methods.

This new EVB model could roughly reproduce the CCSD(T)-F12 energy curve for CD<sub>3</sub>CN---DF complex in bent form, though the energies are underestimated by ~2 kcal/mol when the N-D distance becomes smaller (<1.8 Å).

## 2. Proton-Transfer EVB Model

In accordance with previous work,<sup>3</sup> the force constants of the C-D stretch and C≡N stretch in CD<sub>3</sub>CN were modified to give frequencies in agreement with experiment. The D-F bond was described by the standard Morse potential, and partial charges on D and F atom were set as ±0.414. The vdW parameter of D was chosen as the same as that of the hydrogen atom in water in the MMFF. In the proton transfer state, bonded parameters involving the D-N bond and vdW parameters of the D and N atoms were modified to be identical with those in isocyanide. The partial charges for

the D, N and C (bonded with N) atoms were specified as 0.323, 0.612 and 0.200, respectively. The overall charge in the methyl group thereby turns out to be -0.135. All other parameters used original values in MMFF. The periodic box was constructed with size of  $17.8 \times 17.8 \times 17.8 \text{ \AA}^3$ , containing 1  $\text{CD}_2\text{CN}$ , 1 DF and 61  $\text{CD}_3\text{CN}$  molecules, resulting into a  $64 \times 64$  EVB matrix. The solvation system firstly underwent pre-equilibration NVT simulation of 100 ps, followed by the non-equilibrium vibrational relaxation dynamics. The van der Waals interaction calculation applied an 8.5  $\text{\AA}$  cutoff switching from 6.5  $\text{\AA}$ .

### 3. AMOEBA Force Field

The AMOEBA force field parameters for deuterium fluoride are displayed below in Tinker AMOEBA format. The atomic multipole parameter of DF was obtained by strictly following the seven-step protocol as addressed in the original AMOEBA paper.<sup>4,5</sup> GDMA of version 2<sup>6</sup> was utilized to generate the initial atomic multipoles in the global frame based on the electron density matrix at the MP2/6-311G(1d,1p) level. The sub-program POLEDIT of the Tinker package was then applied to convert the multipole values to the TINKER permanent multipoles, and the subprogram POTENTIAL was used to fit the multipoles to the electrostatic potential at the MP2/aug-cc-pVTZ level. The polarizability of the D and F atoms uses the suggested values in AMOEBA, i.e, 0.6 for F element and 0.496 for D element. The vdW parameters were obtained by fitting to the  $\text{CD}_3\text{CN} \cdots \text{DF}$  post-product potential energy surface.

|      |     |     |         |                            |   |        |   |
|------|-----|-----|---------|----------------------------|---|--------|---|
| atom | 352 | 103 | F       | "F in deuterium fluoride " | 9 | 18.998 | 1 |
| atom | 353 | 104 | D       | "D in deuterium fluoride " | 1 | 2.016  | 1 |
| bond | 103 | 104 | 694.978 | 0.917                      |   |        |   |

|           |     |               |                  |          |          |
|-----------|-----|---------------|------------------|----------|----------|
| vdw       | 103 | 4.84212499399 | 0.0503967839474  |          |          |
| vdw       | 104 | 2.90665504304 | 0.00328415898447 | 0.910    |          |
| multipole | 352 | 353           | -0.36530         |          |          |
|           |     |               | 0.00000          | 0.00000  | 0.29455  |
|           |     |               | -0.31110         |          |          |
|           |     |               | 0.00000          | -0.31110 |          |
|           |     |               | 0.00000          | 0.00000  | 0.62220  |
| multipole | 353 | 352           | 0.36530          |          |          |
|           |     |               | 0.00000          | 0.00000  | -0.19110 |
|           |     |               | -0.12867         |          |          |
|           |     |               | 0.00000          | -0.12867 |          |
|           |     |               | 0.00000          | 0.00000  | 0.25734  |
| polarize  | 352 | 0.6000        | 0.3900           | 353      |          |
| polarize  | 353 | 0.4960        | 0.3900           | 352      |          |

In terms of the AMOEBA force field for CD<sub>3</sub>CN molecule, some modifications were made on the bond parameters so as to better reproduce experimental vibrational frequencies (Table S3).<sup>7</sup> The bond stretch, angle bending, stretch-bending and torsion parameters involved in CD<sub>3</sub>CN are listed below:

|         |     |    |    |                    |        |        |                             |
|---------|-----|----|----|--------------------|--------|--------|-----------------------------|
| atom    | 210 | 79 | C  | "Acetonitrile CN"  | 6      | 12.011 | 2                           |
| atom    | 211 | 80 | N  | "Acetonitrile CN"  | 7      | 14.007 | 1                           |
| atom    | 212 | 82 | C  | "Acetonitrile CD3" | 6      | 12.011 | 4                           |
| atom    | 213 | 83 | D  | "Acetonitrile D3C" | 1      | 2.016  | 1                           |
| bond    | 79  | 80 |    | 1280.0             | 1.1600 |        |                             |
| bond    | 79  | 81 |    | 462.00             | 1.0650 |        |                             |
| bond    | 79  | 82 |    | 380.00             | 1.4570 |        |                             |
| bond    | 82  | 83 |    | 356.60             | 1.0930 |        |                             |
| angle   | 80  | 79 | 82 | 10.00              | 180.00 |        |                             |
| angle   | 79  | 82 | 83 | 45.00              | 109.92 |        |                             |
| angle   | 83  | 82 | 83 | 40.00              | 109.02 |        |                             |
| strbnd  | 80  | 79 | 82 | 9.00               | 9.00   |        |                             |
| strbnd  | 79  | 82 | 83 | 11.50              | 11.50  |        |                             |
| torsion | 80  | 79 | 82 | 83                 | 0.000  | 0.0    | 1 0.000 180.0 2 0.000 0.0 3 |



**Table S3.** Frequency ( $\text{cm}^{-1}$ ) of  $\text{CD}_3\text{CN}$  obtained by AMOEBA force field compared with experimental frequency.

|                        | <i>AMOEBA<br/>Frequency</i> | <i>Experimental<br/>Frequency</i> |
|------------------------|-----------------------------|-----------------------------------|
| $\text{CD}_3\text{CN}$ | 367                         | 331                               |
|                        | 367                         |                                   |
|                        | 785                         | 831                               |
|                        | 802                         | 847                               |
|                        | 802                         |                                   |
|                        | 1054                        | 1046                              |
|                        | 1054                        | 1046                              |
|                        | 1196                        | 1110                              |
|                        | 2123                        | 2126                              |
|                        | 2275                        | 2257                              |
|                        | 2275                        |                                   |
|                        | 2290                        | 2278                              |

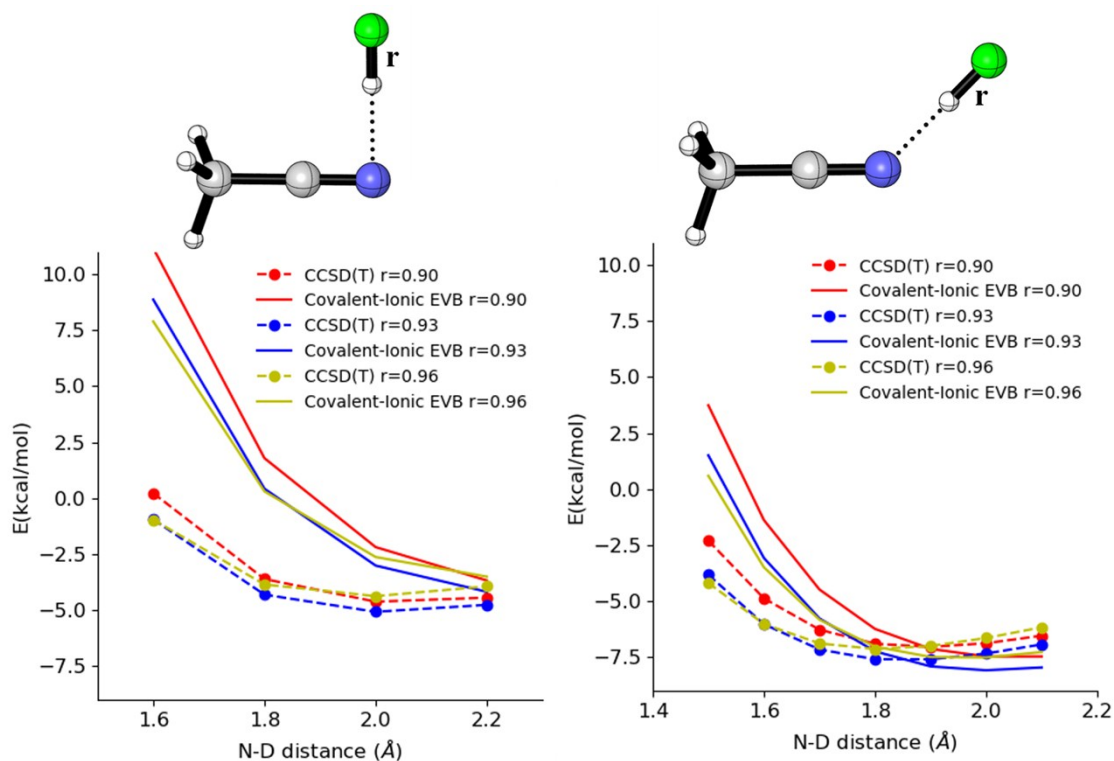

**Figure S5.** Energies (kcal/mol) of the  $\text{CD}_3\text{CN}\cdots\text{DF}$  complex for bent structures (angle C-N-D of respectively 90 and 135 degrees) around the potential energy surface minimum, as described by CCSD(T)-F12 and AMOEBA methods.

The current AMOEBA model gives very large energy for those non-linear complexes, especially at the short N-D distance. Note that those conformations are in fact higher in energy than the linear minimum conformations with identical N-D and D-F distances, and therefore they are less populated in the dynamics. Of course, the current AMOEBA model is not perfect and may suffer from conformational sampling problem, but we believe that it has captured most of phenomena in energy relaxation based on the reproduced energy relaxation time-scale, and similar  $C_a-N_b$  radial distribution compared with proton transfer EVB model.

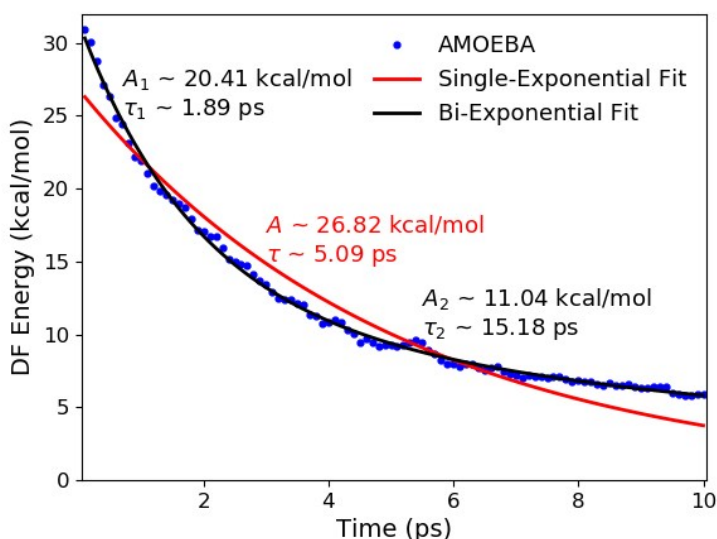

**Figure S6.** Energy relaxation profile of vibrationally excited DF in NEVRD simulation obtained by using the AMOEBA force field. Fitting to a single exponential decay function (red curve) is far from satisfactory, and fitting to a bi-exponential function (black curve) could well describe the energy relaxation.

## 4. Radial Distribution Function

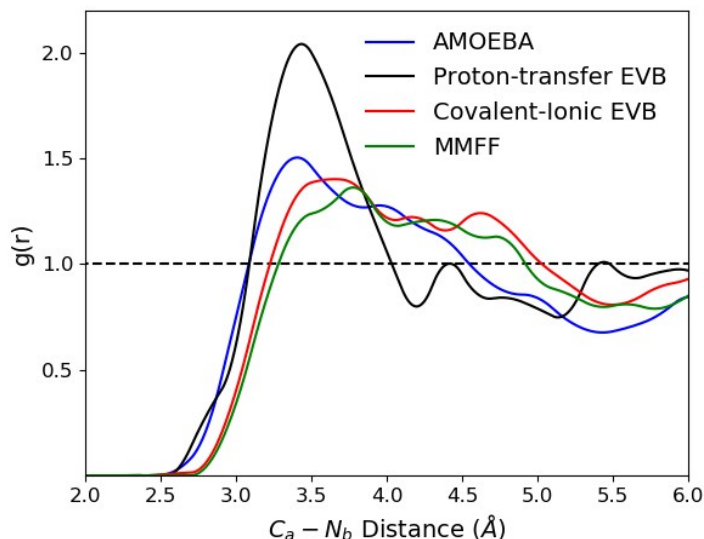

**Figure S7.** Radial distribution function  $g(r)$  of  $C_a$  and  $N_b$  in the 1 ps relaxation dynamics trajectories of vibrationally excited DF (~35 kcal/mol) in solution predicted by different models.  $C_a$  denotes the sp-hybridized C of the H-bonded solvent, and  $N_b$  corresponds to the N atom of the next-nearest solvent molecule.

## References

- 1 T. Shiozaki, G. Knizia and H.-J. Werner, *J. Chem. Phys.*, 2011, **134**, 34113.
- 2 Z. Chen, F. Ying, X. Chen, J. Song, P. Su, L. Song, Y. Mo, Q. Zhang and W. Wu, *Int. J. Quantum Chem.*, 2015, **115**, 731–737.
- 3 D. R. Glowacki, A. J. Orr-Ewing and J. N. Harvey, *J. Chem. Phys.*, 2015, **143**, 44120.
- 4 P. Ren, C. Wu and J. W. Ponder, *J. Chem. Theory Comput.*, 2011, **7**, 3143–3161.
- 5 P. Ren and J. W. Ponder, *J. Phys. Chem. B*, 2003, **107**, 5933–5947.
- 6 A. J. Stone, *J. Chem. Theory Comput.*, 2005, **1**, 1128–1132.
- 7 T. Shimanouchi, *J. Phys. Chem. Ref. data*, 1977, **6**, 993–1102.
